# Supplementary material for: Crystal Structure and Chemical Bonds in [CuII2(Tolf)4(MeOH)2]∙2MeOH
Source: MDPI journal article supplement (doi:10.3390/ijms24021745), 2023-01-16
Supplement: s1 [file s1]

# Crystal structure and chemical bonds in [Cu<sup>II</sup><sub>2</sub>(Tolf)<sub>4</sub>(MeOH)<sub>2</sub>] $\cdot$ 2MeOH

Irena Majerz\*, Marta S. Krawczyk

*Faculty of Pharmacy, Department of Fundamentals of Chemical Sciences, Wrocław Medical University, Borowska 211a, 50-556 Wrocław, Poland.*

*E-mail: irena.majerz@umw.edu.pl, majerz@yahoo.com*

## Supplementary Materials

|                                                                                                                                                                                                                                                                                                                                                                                               |      |
|-----------------------------------------------------------------------------------------------------------------------------------------------------------------------------------------------------------------------------------------------------------------------------------------------------------------------------------------------------------------------------------------------|------|
| Table S1. Geometry of C–H $\cdots\pi$ interactions in [Cu <sup>II</sup> <sub>2</sub> (Tolf) <sub>4</sub> (MeOH) <sub>2</sub> ] $\cdot$ 2MeOH                                                                                                                                                                                                                                                  | p S2 |
| Table S2. Geometry of C–Cl $\cdots\pi$ interaction in [Cu <sup>II</sup> <sub>2</sub> (Tolf) <sub>4</sub> (MeOH) <sub>2</sub> ] $\cdot$ 2MeOH                                                                                                                                                                                                                                                  | p S2 |
| Fig. S1. QTAIM diagram showing C–Cl $\cdots\pi$ interactions in [Cu <sup>II</sup> <sub>2</sub> (Tolf) <sub>4</sub> (MeOH) <sub>2</sub> ] $\cdot$ 2MeOH                                                                                                                                                                                                                                        | p S2 |
| Fig. S2. NCI diagram showing C–Cl $\cdots\pi$ interactions in [Cu <sup>II</sup> <sub>2</sub> (Tolf) <sub>4</sub> (MeOH) <sub>2</sub> ] $\cdot$ 2MeOH                                                                                                                                                                                                                                          | p S3 |
| Fig. S3. IR spectra: Top: for [Cu <sup>II</sup> <sub>2</sub> (Tolf) <sub>4</sub> (MeOH) <sub>2</sub> ] $\cdot$ 2MeOH in the range of 4000 – 400 cm <sup>-1</sup> ;<br>Down: for tolfenamic acid                                                                                                                                                                                               | p S4 |
| Fig. S4. IR spectra: Top: for [Cu <sup>II</sup> <sub>2</sub> (Tolf) <sub>4</sub> (MeOH) <sub>2</sub> ] $\cdot$ 2MeOH in the range of 1800 – 400 cm <sup>-1</sup> ;<br>Down: for tolfenamic acid                                                                                                                                                                                               | p S5 |
| Fig. S5. Raman spectrum for Cu <sup>II</sup> <sub>2</sub> (Tolf) <sub>4</sub> (MeOH) <sub>2</sub> ] $\cdot$ 2MeOH.                                                                                                                                                                                                                                                                            | p S6 |
| Fig. S6. DTA (red) and DTG (blue) curves upon heating run for the<br>Cu <sup>II</sup> <sub>2</sub> (Tolf) <sub>4</sub> (MeOH) <sub>2</sub> ] $\cdot$ 2MeOH crystal.                                                                                                                                                                                                                           | p S7 |
| Fig. S7. Histograms from CSD showing the tendency of Cu(II) $\cdots$ Cu(II) bond lengths<br>(in the range of the sum of van der Waals radii) in paddle-wheel-like double-core Cu(II)<br>compounds with carboxylate ligands. <b>Top</b> : yellow plot for structures with only O-donor<br>ligands; <b>Down</b> : orange plot – for structures with N-donor ligands apart from<br>carboxylates. | p S8 |

**Table S1.** Geometry of C–H... $\pi$  interactions in  $[\text{Cu}^{\text{II}}_2(\text{Tolf})_4(\text{MeOH})_2]\cdot 2\text{MeOH}$ .

| C–H... $\pi$                  | H...Cg (Å) | C...Cg (Å) | $\angle(\text{C–H...Cg})$ (°) |
|-------------------------------|------------|------------|-------------------------------|
| C2M–H2MC...Cg3                | 2.99       | 3.61       | 122                           |
| C11B–H11B...Cg1 <sup>ii</sup> | 2.93       | 3.77       | 147                           |

Symmetry code: ii = 1-x, -y, 2-z

**Table S2.** Geometry of C–Cl... $\pi$  interaction in  $[\text{Cu}^{\text{II}}_2(\text{Tolf})_4(\text{MeOH})_2]\cdot 2\text{MeOH}$ .

| C–Cl... $\pi$                 | Cl...Cg (Å) | C...Cg (Å) | $\angle(\text{C–Cl...Cg})$ (°) |
|-------------------------------|-------------|------------|--------------------------------|
| C10B–Cl2...Cg2 <sup>iii</sup> | 3.43        | 4.86       | 137                            |

Symmetry code: iii = 1-x, -y, 2-z

Centres of aromatic rings:

Cg1 [C2A/C3A/C4A/C5A/C6A/C7A],

Cg2 [C2B/C3B/C4B/C5B/C6B/C7B],

Cg3 [C8A/C9A/C10A/C11A/C12A/C13A]

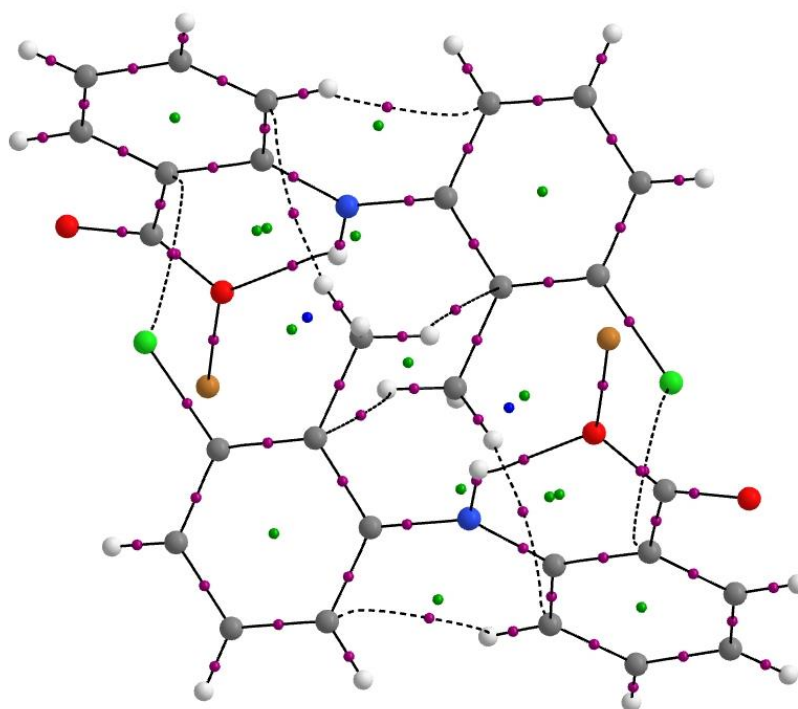**Figure S1.** QTAIM diagram showing C–Cl... $\pi$  interactions in  $[\text{Cu}^{\text{II}}_2(\text{Tolf})_4(\text{MeOH})_2]\cdot 2\text{MeOH}$ .

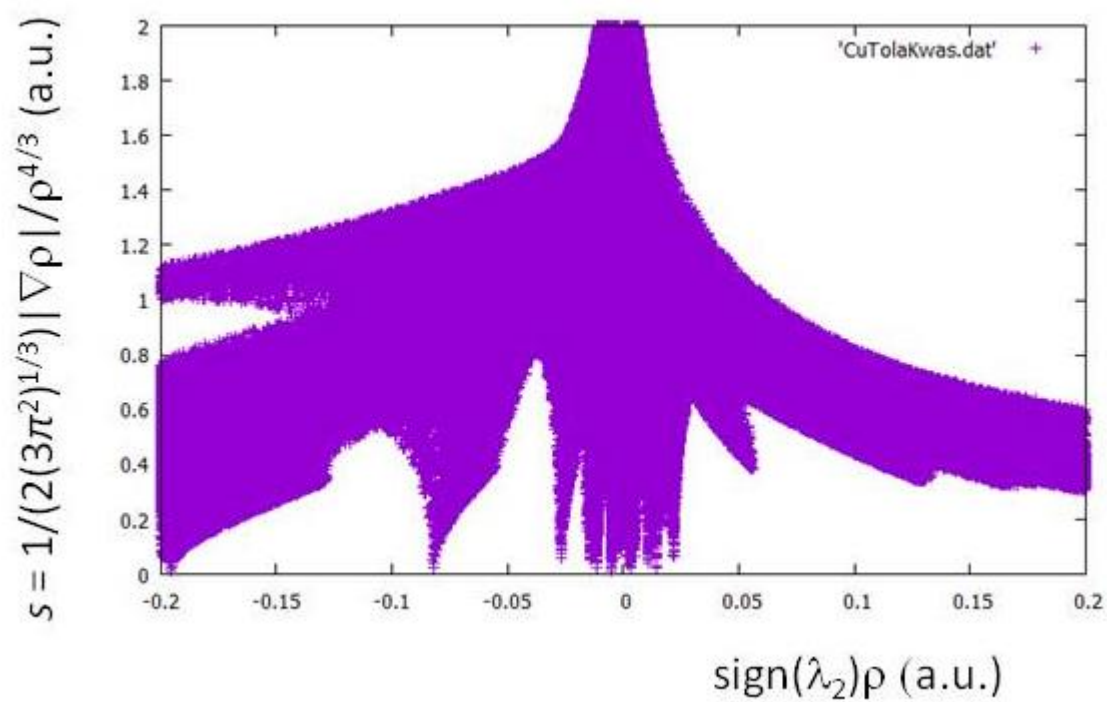

Figure S2. NCI diagram showing C–Cl $\cdots$  $\pi$  interactions in  $[\text{Cu}^{\text{II}}_2(\text{Tolf})_4(\text{MeOH})_2]\cdot 2\text{MeOH}$ .

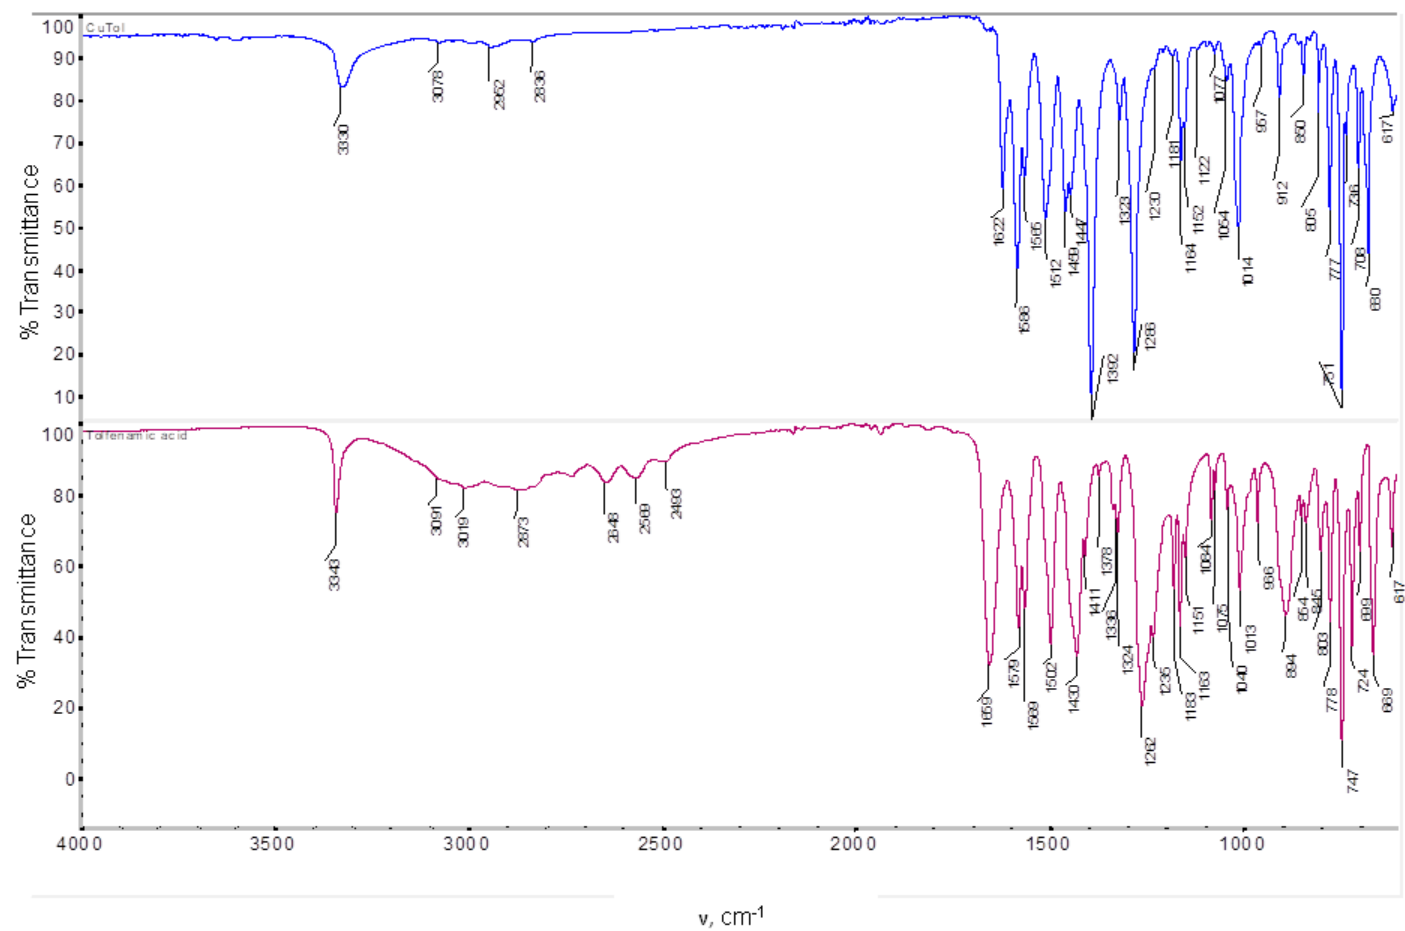

Figure S3. IR spectra: Top: for  $[\text{Cu}^{\text{II}}_2(\text{Tolf})_4(\text{MeOH})_2] \cdot 2\text{MeOH}$  in the range of 4000 – 400  $\text{cm}^{-1}$ ; Down: for tolfenamic acid.

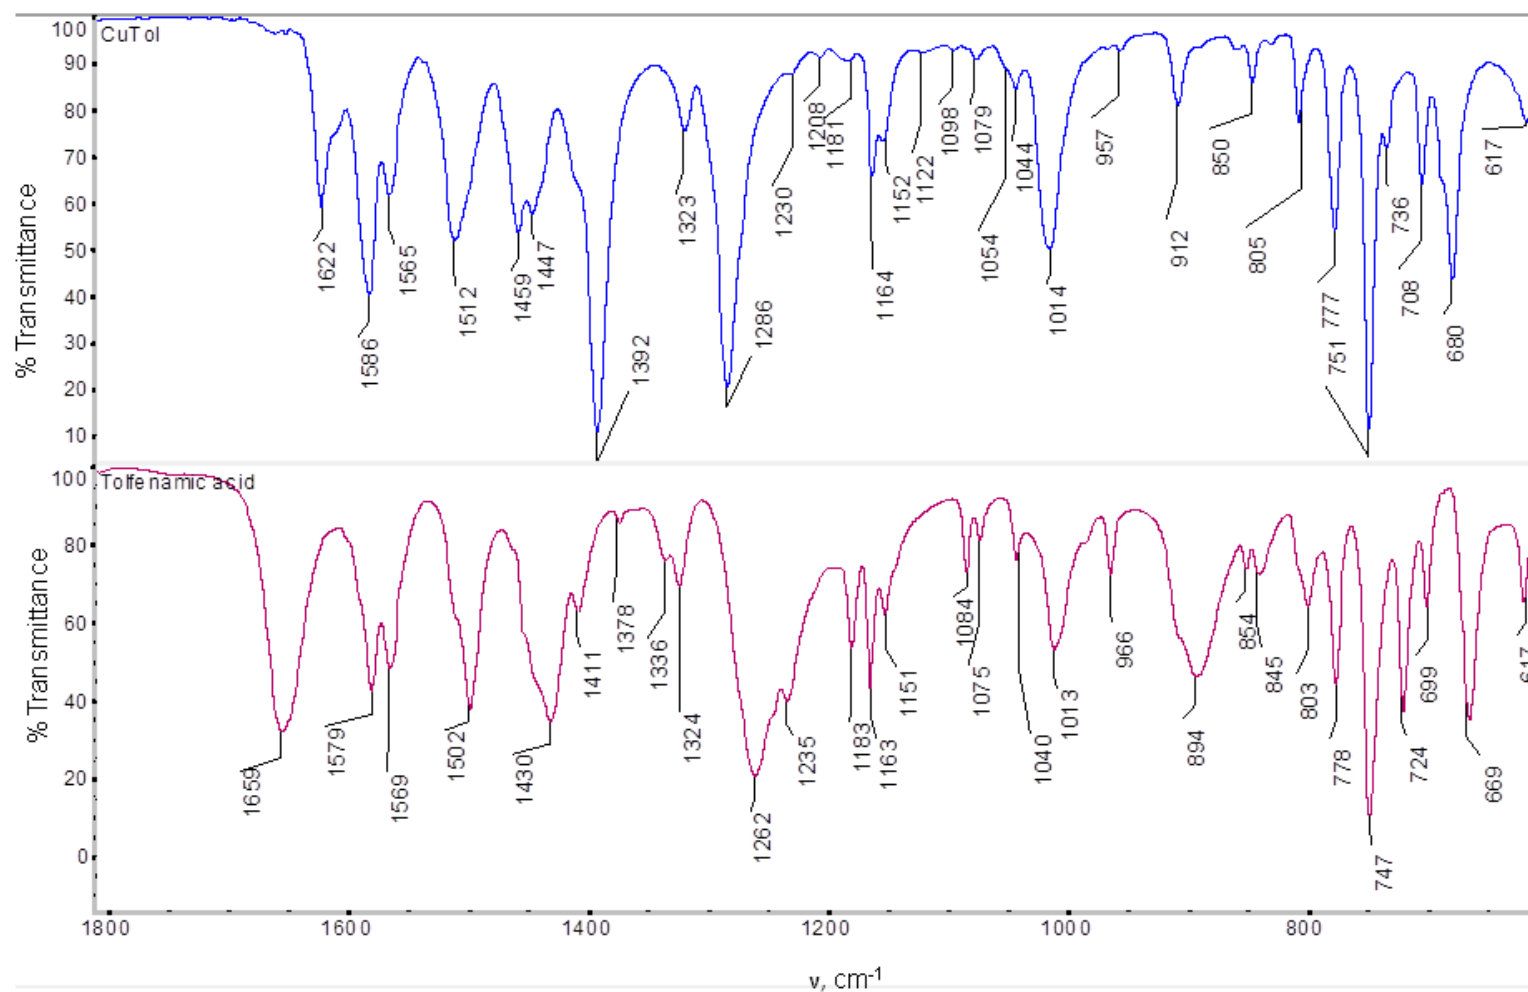

Figure S4. IR spectra: Top: for  $[\text{Cu}^{\text{II}}_2(\text{Tolf})_4(\text{MeOH})_2] \cdot 2\text{MeOH}$  in the range of 1800 – 400  $\text{cm}^{-1}$  Down: for tolfenamic acid.

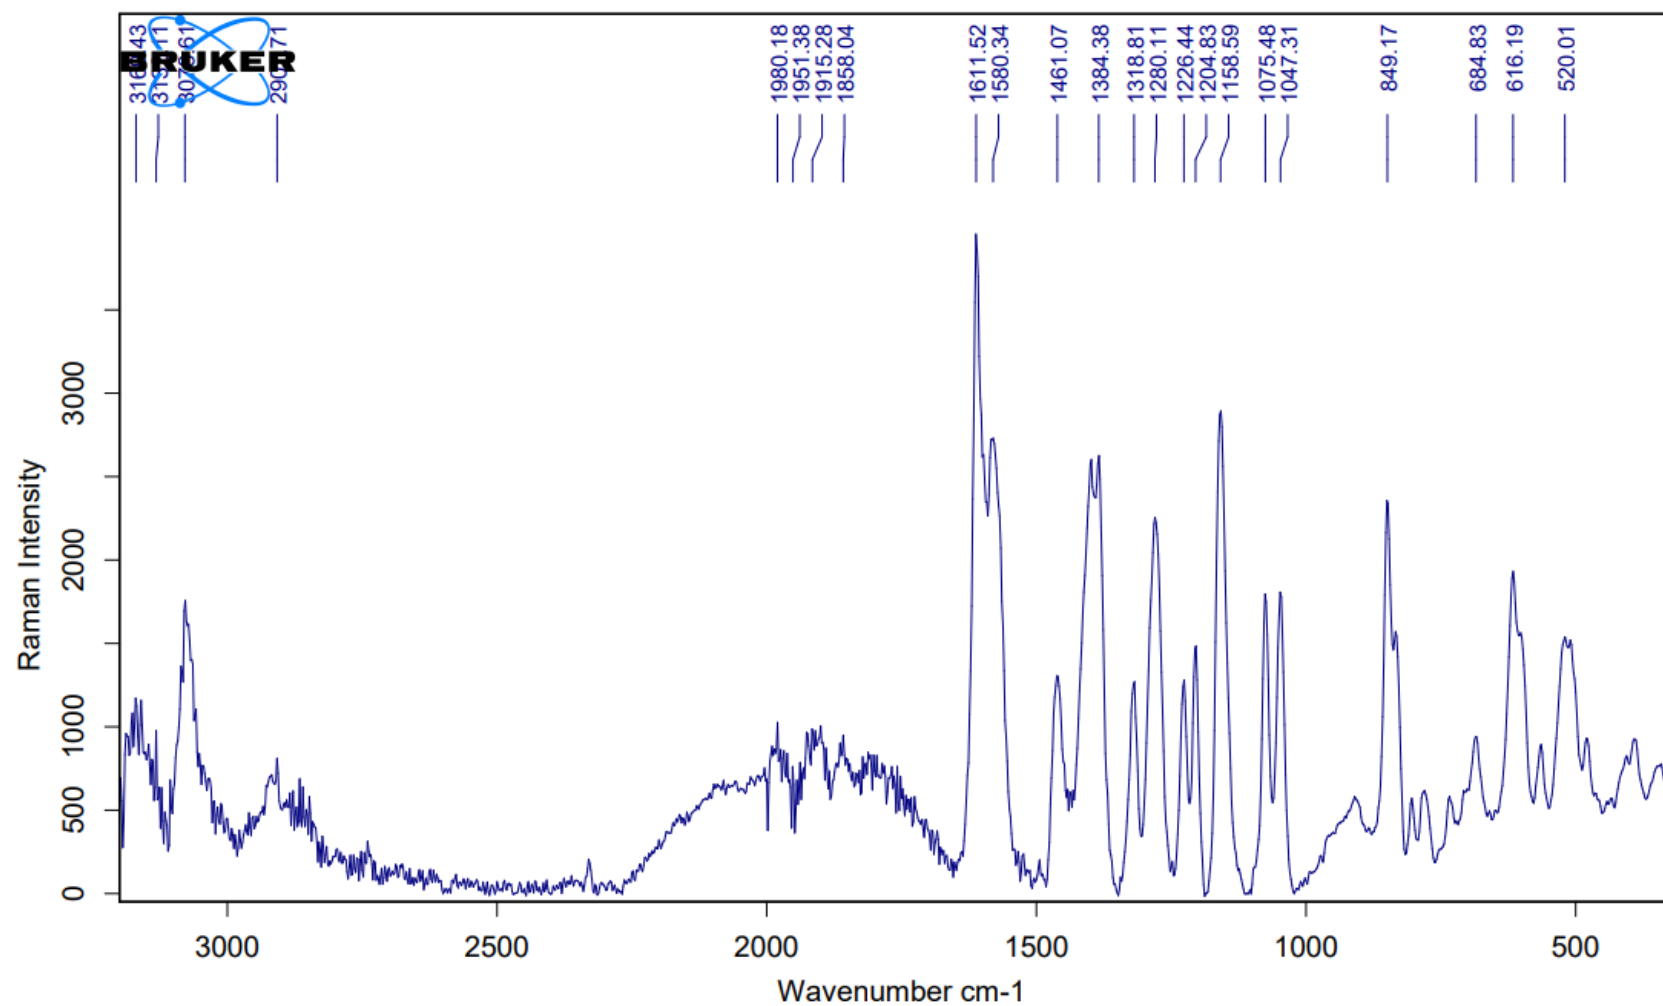

Figure S5. Raman spectrum for  $[\text{Cu}^{\text{II}}_2(\text{Tolf})_4(\text{MeOH})_2] \cdot 2\text{MeOH}$ .

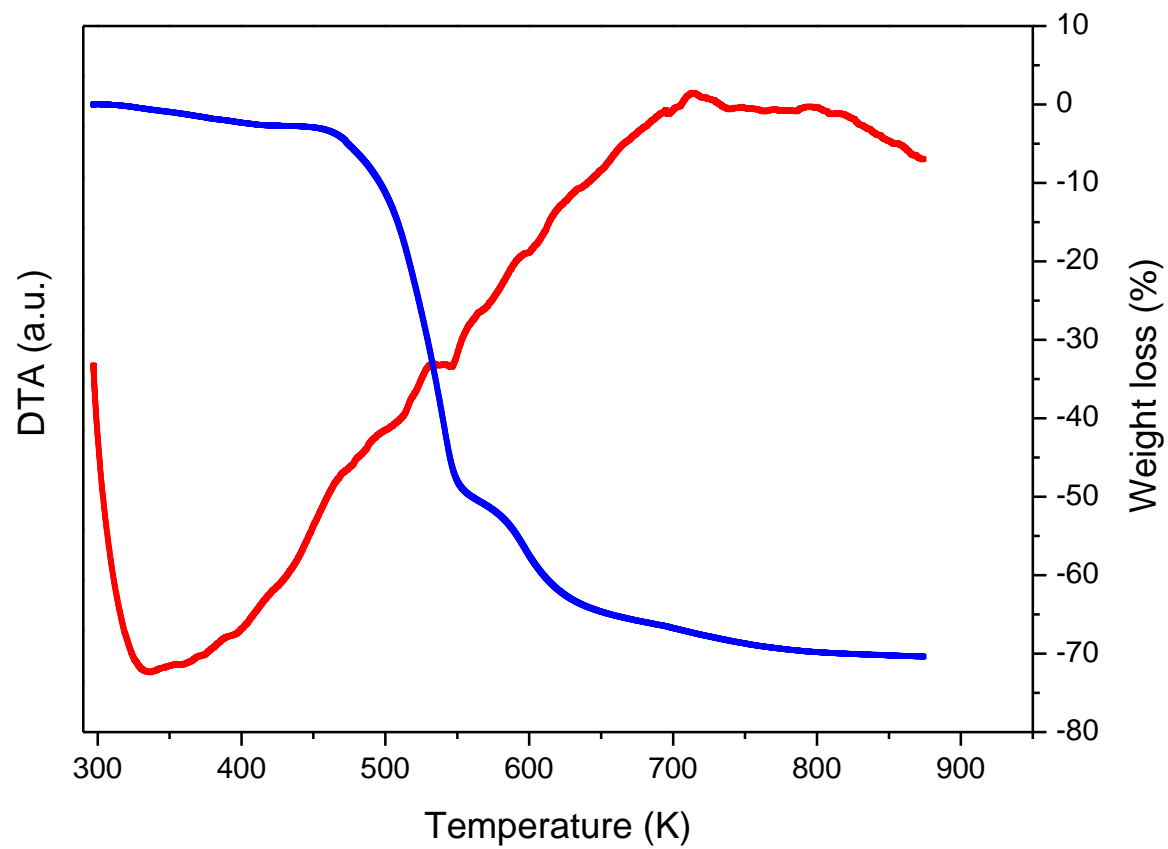

Figure S6. DTA (red) and DTG (blue) curves upon heating run for the  $\text{Cu}^{\text{II}}_2(\text{Tolf})_4(\text{MeOH})_2 \cdot 2\text{MeOH}$  crystal.

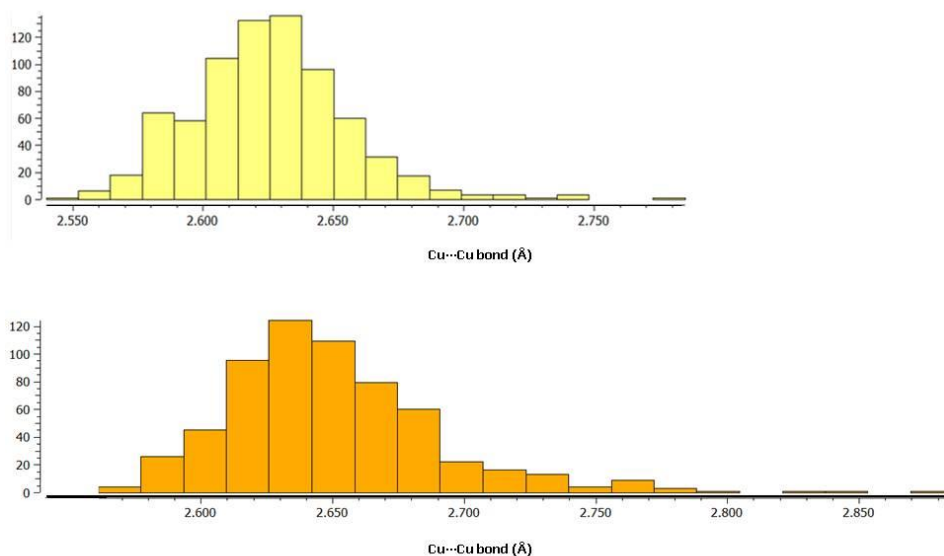

Figure S7. Histograms from CSD showing the tendency of Cu(II)⋯Cu(II) bond lengths (in the range of the sum of van der Waals radii) in paddle-wheel-like double-core Cu(II) compounds with carboxylate ligands. **Top:** yellow plot for structures with only O-donor ligands; **Down:** orange plot – for structures with N-donor ligands apart from carboxylates.

The adopted criterion for the distances Cu(II)⋯Cu(II): distances in the range of the sum of van der Waals radii, where the value of the van der Waals radius for Cu was determined by Bondi (Bondi, A. "van der Waals Volumes and Radii". *J. Phys. Chem.* **1964**, 68 (3) 441–451. [doi:10.1021/j100785a001](https://doi.org/10.1021/j100785a001).)
